# Supplementary material
Source: publisher figshare collection journal article supplement (https://karger.figshare.com/articles/dataset/_/5120875)
Supplement: Supplementary file 1 [file 1]

Archive with 2 entries (2 files):
- 000251961_sm_Figure.pdf
- 000251961_sm_table.pdf
