# Supplementary material
Source: publisher figshare collection journal article supplement (https://karger.figshare.com/articles/dataset/_/5120875)
Supplement: Supplementary file 1 [file 1 › 000251961_sm_Figure.pdf]

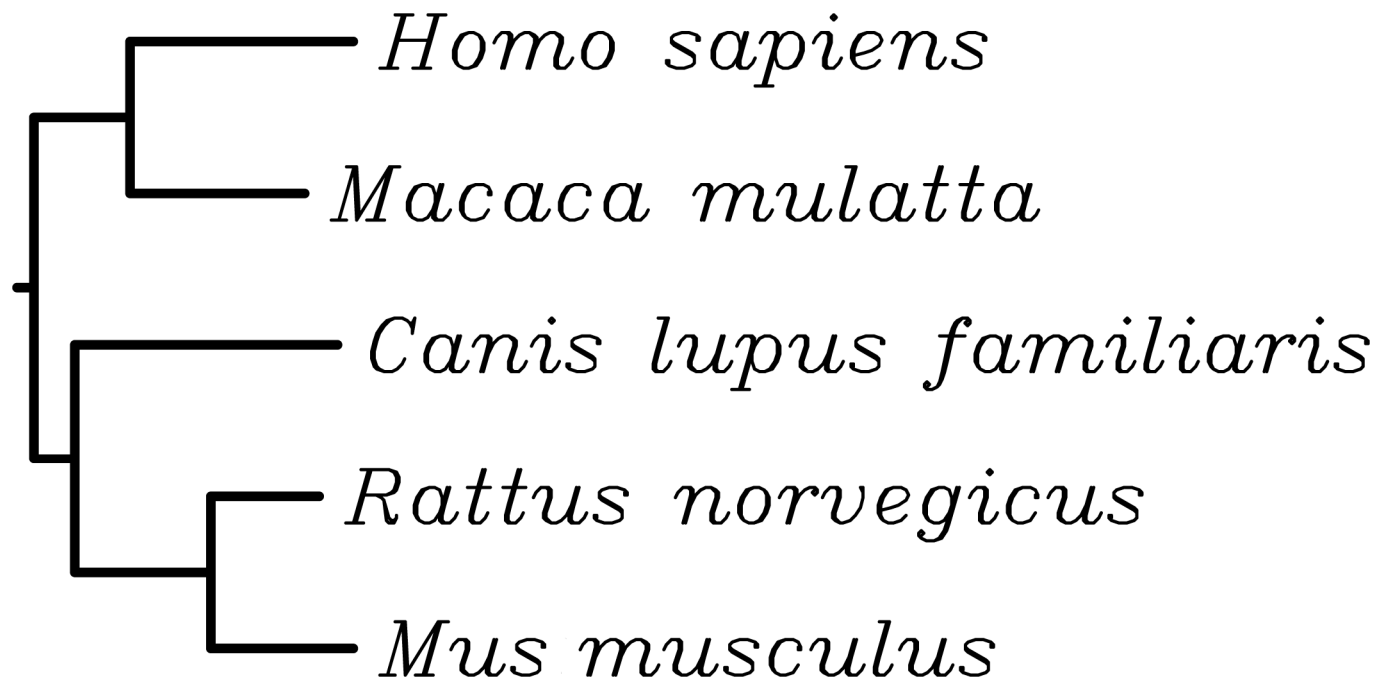

Supplementary figure 1: Phylogenetic tree constructed from multiple alignment of human (*Homo sapiens*), monkey (*Macaca mulatta*), dog (*Canis lupus familiaris*), rat (*Rattus norvegicus*) and mouse (*Mus musculus*) CCDC33 proteins. The tree was generated by using ClustalW program, branch length represents the distance in protein similarity.
