# Supplementary material
Source: publisher figshare collection journal article supplement (https://karger.figshare.com/articles/dataset/_/5120875)
Supplement: Supplementary file 1 [file 1 › 000251961_sm_table.pdf]

Primers used for the analysis of the alternative splicing of *Ccdc33* gene:

**Exons: 1-5**

LEFT PRIMER: TGGAGAGAAGACACTGGACCTG

RIGHT PRIMER: AGCTTCCTTTAAATGCCTGCTG

**Exon: 3-8**

LEFT PRIMER: GGAGGCCCTGAGTGACAAGATA

RIGHT PRIMER: TGTTGGCTTTCTCTGATGTGGT

**Exon: 5-9**

LEFT PRIMER: CCACCTGTGAAATGGATGAGAA

RIGHT PRIMER: CGTAGGACACCAGCTCCTTCTT

**Exon: 6-11**

LEFT PRIMER: AACCTCCTGCTTAGCTGTCCAT

RIGHT PRIMER: CTACCCGAGCAATTACCACCAT

**Exon: 8-15**

LEFT PRIMER: ACCACATCAGAGAAAGCCAACA

RIGHT PRIMER: AAAGCAGCTGGAAGGAGAGGTT

**Exon: 10-17**

LEFT PRIMER: GTTGGCTGTGACCATACAGCTC

RIGHT PRIMER: TCTTCTATGCTCTGCTGGCTCA

**Exon: 13-20**

LEFT PRIMER: GAACCAGTCCTTCCTCTTCCAA

RIGHT PRIMER: GGCCTGTTTGATGGTATTGGTT

**Exon: 16-23**

LEFT PRIMER: CCACTCAGGAAATGGAGGAACT

RIGHT PRIMER: CTAGCTTGGCCAGGAGGTTAAA

**Exon: 18-25**

LEFT PRIMER: GATATGAAGAGGCTGCGAGACA

RIGHT PRIMER: GAGAGTCTGAGGGTCTGTTGAGC

**Exon:20-25**

LEFT PRIMER: CGAGAAGATGGAGCAGATATTGGA

RIGHT PRIMER: CAGCACATGGCGAAGGAGAT

Supplementary table 1
